# Supplementary material
Source: HighWire-hosted journal article supplement (https://hw-f5-jim.highwire.org/content/70/7/1545)

Online supplement: Time between referral and appointment

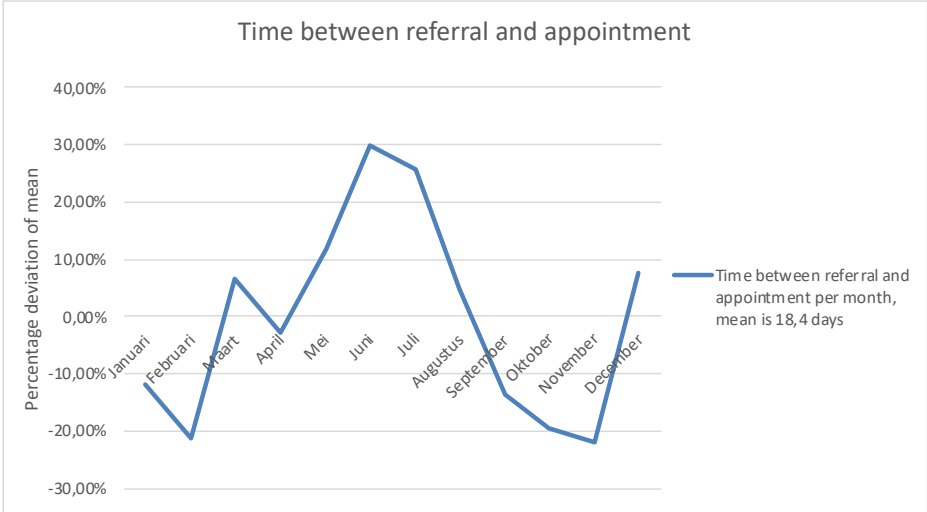

Supplement: inline-supplementary-material-1 [file inline-supplementary-material-1.pdf]
